# Supplementary material for: Trends in hospital and intensive care admissions in the Netherlands attributable to the very elderly in an ageing population
Source: Springer Nature journal article supplement (doi:10.1186/s13054-015-1061-z), 2015-09-30
Supplement: MOESM1 [file 9780730]

**Additional file 1**

**APACHE II and APACHE IV reasons for intensive care unit admission related to cardiac surgery.**

---

| <b>Reasons for intensive care unit admission</b> |                                                                                             |
|--------------------------------------------------|---------------------------------------------------------------------------------------------|
| <b>APACHE II</b>                                 | Heart valve surgery - surgical                                                              |
|                                                  | Chronic cardiovascular disease - surgical                                                   |
| <b>APACHE IV</b>                                 | Aortic and mitral valve replacement                                                         |
|                                                  | Aortic valve replacement, isolated                                                          |
|                                                  | Atrial septal defect repair                                                                 |
|                                                  | Coronary artery bypass grafting alone                                                       |
|                                                  | Coronary artery bypass grafting redo                                                        |
|                                                  | Coronary artery bypass grafting redo with other operation                                   |
|                                                  | Coronary artery bypass grafting redo with valve repair/replacement                          |
|                                                  | Coronary artery bypass grafting with aortic valve replacement                               |
|                                                  | Coronary artery bypass grafting with double valve repair/replacement                        |
|                                                  | Coronary artery bypass grafting with mitral valve repair                                    |
|                                                  | Coronary artery bypass grafting with mitral valve replacement                               |
|                                                  | Coronary artery bypass grafting with other operation                                        |
|                                                  | Coronary artery bypass grafting with pulmonic or tricuspid valve repair or replacement only |
|                                                  | Coronary artery bypass grafting, minimally invasive, mid-CABG                               |
|                                                  | Mitral valve repair                                                                         |
|                                                  | Mitral valve replacement                                                                    |
|                                                  | Tricuspid valve surgery                                                                     |
|                                                  | Ventricular septal defect repair                                                            |

---
